# Supplementary material for: RNA Polymerase II cluster dynamics predict mRNA output in living cells
Source: eLife. 2016 May 3;5:e13617. doi: 10.7554/eLife.13617 (PMC4929003; doi:10.7554/eLife.13617)
Supplement: Figure 1—source data 1. — Experimentally measured Pol II cluster lifetimes are provided. DOI: http://dx.doi.org/10.7554/eLife.13617.003 [file elife-13617-fig1-data1.xlsx]

## Sheet: Sheet1
Pol II cluster lifetime (Figure 1E)
Pol II cluster lifetime (sec)
4.4517
2.1945
6.8343
3.1977
13.794
3.5739
9.405
1.1913
1.3794
6.2073
6.897
4.389
6.7716
6.897
4.2636
25.0173
0.8151
2.3826
0.8151
2.0691
4.7652
8.5899
2.8215
18.81
4.0128
9.1542
7.7748
3.9501
8.5272
8.2137
11.2233
3.6366
3.4485
3.4485
6.6462
17.4933
5.5803
43.5138
5.5176
13.794
19.6878
7.0224
11.5368
22.5093
7.9002
3.6993
24.0141
4.2636
6.4581
6.5208
4.6398
2.0691
2.0691
40.8804
4.389
1.4421
3.6993
19.9386
3.0723
8.0256
8.151
27.4626
10.659
9.0288
2.3826
1.6302
3.1977
7.4613
4.0128
1.7556
2.9469
6.7716
16.2393
44.9559
5.3922
23.0109
20.5656
7.2732
4.0128
18.8727
10.2201
3.135
3.0096
32.5413
23.0736
25.3308
8.0256
7.3986
3.8874
16.2603
2.9904
1.4329
10.9025
9.0958
5.6693
13.8306
11.7124
37.6292
21.8673
7.9121
3.4265
2.8658
6.23
4.361
8.5974
14.4536
2.0559
17.2571
5.1086
4.984
4.0495
15.4504
4.1741
7.0399
3.4888
5.1086
4.984
3.0527
4.6102
5.7939
4.2987
1.7444
2.1182
3.3019
7.9744
4.7971
74.2616
14.8897
6.2923
5.607
4.984
2.2428
2.6166
4.8594
6.4169
105.1
3.9249
4.984
3.5511
3.6757
10.5287
30.0286
15.2012
4.2364
2.4297
2.0559
1.869
4.8594
3.0527
1.6198
5.0463
26.9136
6.9776
2.6166
4.1118
2.2428
5.9808
2.2428
8.8466
11.4009
2.7412
5.8562
4.8594
14.1421
6.7284
31.3369
11.5878
6.4792
5.7316
20.6213
26.2906
13.8929
3.6134
3.738
7.182
19.53
3.339
11.403
3.717
14.553
9.072
4.032
20.034
39.123
12.726
15.309
6.552
36.792
12.096
20.16
13.041
3.024
4.032
5.166
4.599
14.994
11.34
2.961
10.71
4.158
15.561
5.544
39.879
3.528
2.583
16.317
3.276
15.624
9.702
1.764
8.946
9.198
47.376
7.056
