# Supplementary material for: RNA Polymerase II cluster dynamics predict mRNA output in living cells
Source: eLife. 2016 May 3;5:e13617. doi: 10.7554/eLife.13617 (PMC4929003; doi:10.7554/eLife.13617)
Supplement: Figure 3—source data 1. — Time-dependent detection profiles of accumulated Dendra2-Pol II co-localized with β-actin mRNA foci in fixed cells are provided. DOI: http://dx.doi.org/10.7554/eLife.13617.011 [file elife-13617-fig3-data1.xlsx]

## Sheet: Sheet1
Traces in fixed cells (Figure 3D)
Trace 1			Trace 2			Trace 3			Trace 4			Trace 5			Trace 6			Trace 7			Trace 8			Trace 9			Trace 10			Trace 11			Trace 12			Trace 13			Trace 14			Trace 15			Trace 16			Trace 17
Frame #	Cumulant		Frame #	Cumulant		Frame #	Cumulant		Frame #	Cumulant		Frame #	Cumulant		Frame #	Cumulant		Frame #	Cumulant		Frame #	Cumulant		Frame #	Cumulant		Frame #	Cumulant		Frame #	Cumulant		Frame #	Cumulant		Frame #	Cumulant		Frame #	Cumulant		Frame #	Cumulant		Frame #	Cumulant		Frame #	Cumulant
35	1		3	1		28	1		15	1		1	1		1	1		1	1		35	1		4	3		16	1		572	1		204	1		10	1		778	2		1012	1		4	1		255	3
36	1		5	1		29	1		18	1		2	2		2	2		61	60		47	1		6	3		26	1		573	1		334	1		13	1		779	2		4267	1		6	1		256	3
37	2		6	2		30	2		19	2		3	3		3	3		62	60		48	2		7	4		27	2		574	2		338	5		14	2		780	3		4268	2		7	2		258	5
56	2		7	2		233	2		227	2		4	4		4	4		68	66		56	2		10	4		88	2		4642	2		340	5		36	2		919	3		4912	2		62	2		259	5
57	3		8	3		234	3		228	3		5	5		5	5		71	66		57	3		14	8		107	21		4645	5		341	6		37	3		922	6		4913	3		63	3		260	6
183	3		10	3		1172	3		551	3		6	6		6	6		73	68		212	3		15	8		108	21		4646	5		342	6		44	3		954	6		5498	3		65	3		534	6
184	4		11	4		1174	5		552	4		7	7		7	7		76	68		213	4		18	11		114	27		4650	9		347	11		45	4		956	8		5499	4		66	4		535	7
190	4		17	4		1369	5		928	4		8	8		8	8		79	71		963	4		20	11		115	27		4661	9		1477	11		53	4		1761	8		5847	4		68	4		536	7
191	5		23	10		1370	6		929	5		9	9		9	9		80	71		964	5		23	14		122	34		4662	10		1478	12		54	5		1762	9		5848	5		69	5		538	9
200	5		26	10		1909	6		1740	5		10	10		10	10		81	72		965	5		24	14		123	34		6614	10		2878	12		55	5		3090	9		8846	5		70	5		540	9
201	6		27	11		1910	7		1741	6		11	11		11	11		103	72		966	6		25	15		124	35		6619	15		2879	13		56	6		3091	10		8847	6		71	6		541	10
209	6		73	11		1918	7		1760	6		12	12		12	12		105	74		968	6		27	15		125	35		16619	15		3720	13		120	6		3101	10		18847	6		83	6		949	10
210	7		74	12		1919	8		1762	8		13	13		13	13		123	74		969	7		41	29		127	37					3721	14		122	8		3102	11					84	7		950	11
249	7		111	12		1924	8		1769	8		14	14		14	14		124	75		970	7		48	29		153	37					3758	14		128	8		3882	11					114	7		1245	11
250	8		112	13		1925	9		1770	9		15	15		15	15		375	75		971	8		49	30		154	38					3759	15		131	11		3883	12					115	8		1246	12
429	8		168	13		3155	9		4712	9		16	16		16	16		376	76		974	8		72	30		158	38					3778	15		136	11		4562	12					122	8		2863	12
430	9		170	15		3156	10		4713	10		17	17		17	17		379	76		975	9		73	31		161	41					3780	17		154	29		4565	15					123	9		2864	13
521	9		689	15		6782	10		4715	10		18	18		18	18		380	77		976	9		80	31		181	41					3797	17		158	29		14565	15					129	9		2962	13
522	10		690	16		6783	11		4716	11		19	19		19	19		381	77		978	11		81	32		182	42					3798	18		160	31								130	10		2963	14
528	10		702	16		7508	11		4718	11		20	20		20	20		382	78		979	11		87	32		188	42					3811	18		161	31								162	10		3096	14
529	11		703	17		7509	12		4719	12		21	21		21	21		446	78		982	14		88	33		189	43					3812	19		162	32								163	11		3098	16
547	11		737	17		8097	12		4720	12		22	22		22	22		447	79		2038	14		114	33		253	43					3813	19		178	32								165	11		3104	16
549	13		738	18		8098	13		4723	15		23	23		23	23		3305	79		2039	15		115	34		254	44					3814	20		180	34								166	12		3105	17
551	13		941	18		18098	13		4756	15		24	24		24	24		3306	80		2041	15		117	34		561	44					3817	20		184	34								174	12		4122	17
553	15		942	19					4757	16		25	25		25	25		13306	80		2043	17		118	35		562	45					3818	21		186	36								175	13		4123	18
555	15		981	19					4761	16		26	26		26	26					2198	17		149	35		700	45					3834	21		187	36								176	13		4133	18
557	17		982	20					4764	19		27	27		27	27					2199	18		150	36		701	46					3835	22		188	37								177	14		4134	19
558	17		1008	20					4862	19		28	28		28	28					2563	18		170	36		906	46					3844	22		193	37								181	14		4146	19
564	23		1010	22					4863	20		29	29		29	29					2564	19		171	37		910	50					3848	26		194	38								182	15		4147	20
685	23		1011	22					4864	20		30	30		30	30					3223	19		199	37		1918	50					3864	26		199	38								183	15		8015	20
686	24		1012	23					4865	21		31	31		31	31					3224	20		200	38		1919	51					3865	27		200	39								187	19		8016	21
733	24		1102	23					4879	21		32	32		32	32					3229	20		374	38		2495	51					3870	27		335	39								188	19		11884	21
734	25		1103	24					4880	22		33	33		33	33					3255	46		375	39		2499	55					3871	28		336	40								193	24		11885	22
735	25		1147	24					5178	22		34	34		34	34					3257	46		491	39		2500	55					3873	28		781	40								194	24		12195	22
737	27		1148	25					5179	23		35	35		35	35					3259	48		494	42		2501	56					3874	29		782	41								196	26		12196	23
837	27		1151	25					5945	23		36	36		36	36					7548	48		495	42		2519	56					3885	29		783	41								198	26		12202	23
838	28		1152	26					5946	24		37	37		37	37					7549	49		500	47		2521	58					3890	34		784	42								199	27		12205	26
852	28		2379	26					15946	24		38	38		38	38					17549	49		501	47		12521	58					3891	34		876	42								202	27		22205	26
854	30		2380	27								39	39		39	39								503	49								3896	39		877	43								204	29
855	30		2565	27								40	40		40	40								504	49								3898	39		2930	43								205	29
856	31		2566	28								41	41		41	41								507	52								3899	40		2935	48								207	31
1009	31		4553	28								42	42		42	42								513	52								3906	40		2938	48								209	31
1010	32		4554	29								43	43		43	43								514	53								3907	41		2940	50								210	32
1242	32		4560	29								44	44		44	44								515	53								4952	41		3011	50								213	32
1244	34		4561	30								45	45		45	45								517	55								4953	42		3015	54								214	33
1287	34		5583	30								46	46		46	46								928	55								5837	42		3017	54								215	33
1288	35		5585	32								47	47		47	47								929	56								5838	43		3018	55								216	34
1634	35		5801	32								48	48		48	48								1160	56								7055	43		3020	55								222	34
1635	36		5802	33								49	49		49	49								1161	57								7057	45		3022	57								223	35
1675	36		5803	33								50	50		50	50								1163	57								7059	45		3321	57								224	35
1676	37		5804	34								51	51		51	51								1164	58								7060	46		3322	58								226	37
1684	37		6407	34								52	52		52	52								1354	58								7072	46		5142	58								227	37
1685	38		6408	35								53	53		53	53								1355	59								7073	47		5143	59								228	38
1716	38		6743	35								54	54		54	54								1356	59								7079	47		10024	59								229	38
1717	39		6744	36								55	55		55	55								1357	60								7081	49		10025	60								230	39
1727	39		7010	36								56	56		56	56								2089	60								7084	49		10026	60								233	39
1728	40		7011	37								57	57		57	57								2090	61								7085	50		10027	61								234	40
1866	40		7090	37								58	58		58	58								2094	61								9263	50		10342	61								247	40
1867	41		7091	38								59	59		59	59								2097	64								9267	54		10343	62								248	41
2026	41		7767	38								60	60		60	60								2784	64								19267	54		20343	62								288	41
2027	42		7768	39								61	61		61	61								2785	65																				289	42
2347	42		8144	39								62	62		62	62								5805	65																				298	42
2348	43		8145	40								63	63		63	63								5806	66																				299	43
2625	43		8156	40								64	64		64	64								5807	66																				304	43
2626	44		8157	41								65	65		65	65								5808	67																				305	44
2811	44		8163	41								66	66		66	66								5980	67																				335	44
2815	48		8168	46								67	67		67	67								5981	68																				336	45
2947	48		8169	46								68	68		68	68								6881	68																				337	45
2948	49		8170	47								69	69		69	69								6882	69																				338	46
3018	49		8171	47								70	70		70	70								7267	69																				377	46
3020	51		8172	48								71	71		71	71								7268	70																				378	47
3217	51		8173	48								72	72		72	72								17268	70																				441	47
3220	54		8175	50								73	73		73	73																													442	48
3430	54		8178	50								74	74		74	74																													448	48
3431	55		8180	52								75	75		75	75																													449	49
4046	55		8181	52								76	76		76	76																													451	49
4049	58		8183	54								77	77		77	77																													452	50
4050	58		8184	54								78	78		78	78																													459	50
4051	59		8185	55								79	79		79	79																													460	51
4053	59		8186	55								80	80		80	80																													463	51
4054	60		8187	56								81	81		81	81																													464	52
4264	60		8793	56								82	82		82	82																													465	52
4267	63		8794	57								83	83		83	83																													466	53
4303	63		9412	57								84	84		84	84																													467	53
4305	65		9413	58								85	85		85	85																													468	54
4443	65		19413	58								86	86		86	86																													470	54
4444	66											87	87		87	87																													471	55
4643	66											88	88		88	88																													472	55
4644	67											89	89		89	89																													473	56
4645	67											90	90		90	90																													481	56
4646	68											91	91		91	91																													482	57
5212	68											92	92		92	92																													488	57
5213	69											93	93		93	93																													489	58
6395	69											94	94		94	94																													499	58
6398	72											95	95		95	95																													501	60
9637	72											96	96		96	96																													502	60
9638	73											97	97		97	97																													503	61
19638	73											98	98		98	98																													507	61
												99	99		99	99																													508	62
												100	100		100	100																													512	62
												101	101		101	101																													514	64
												102	102		102	102																													522	64
												103	103		103	103																													524	66
												104	104		104	104																													525	66
												105	105		105	105																													526	67
												106	106		106	106																													528	67
												107	107		107	107																													530	69
												108	108		108	108																													535	69
												109	109		109	109																													536	70
												110	110		110	110																													538	70
												111	111		111	111																													539	71
												112	112		112	112																													541	71
												113	113		113	113																													542	72
												114	114		114	114																													543	72
												115	115		115	115																													544	73
												116	116		116	116																													551	73
												117	117		117	117																													553	75
												118	118		118	118																													554	75
												119	119		119	119																													555	76
												120	120		120	119																													556	76
												121	121		121	120																													557	77
												122	122		122	121																													566	77
												123	123		123	122																													568	79
												124	124		124	123																													571	79
												125	125		125	124																													572	80
												126	126		126	125																													573	80
												127	127		127	126																													575	82
												128	128		128	127																													577	82
												129	129		129	128																													578	83
												130	130		130	128																													588	83
												131	131		131	129																													590	85
												132	132		132	129																													596	85
												133	133		133	130																													597	86
												134	134		134	131																													602	86
												135	135		135	132																													603	87
												136	136		136	133																													612	87
												137	137		137	134																													613	88
												138	138		138	135																													620	88
												139	139		139	136																													621	89
												140	140		140	137																													622	89
												141	141		141	137																													626	93
												142	142		142	138																													627	93
												143	143		143	139																													628	94
												144	144		144	140																													630	94
												145	145		145	141																													631	95
												146	146		146	142																													632	95
												147	147		147	143																													633	96
												148	148		148	144																													636	96
												149	149		149	144																													644	104
												150	150		150	144																													645	104
												151	151		151	145																													647	106
												152	152		152	146																													648	106
												153	153		153	147																													650	108
												154	154		154	148																													651	108
												155	155		155	148																													654	111
												156	156		156	149																													655	111
												157	157		157	150																													791	247
												158	158		158	151																													841	247
												159	159		159	152																													842	248
												160	160		160	153																													851	248
												161	161		161	153																													852	249
												162	162		162	153																													853	249
												163	163		163	154																													855	251
												164	164		164	154																													856	251
												165	165		165	155																													857	252
												166	166		166	156																													858	252
												167	167		167	156																													859	253
												168	168		168	157																													871	253
												169	169		169	158																													872	254
												170	170		170	158																													876	254
												171	171		171	158																													878	256
												172	172		172	159																													880	256
												173	173		173	160																													881	257
												174	173		174	160																													885	257
												175	174		175	160																													888	260
												176	175		176	161																													889	260
												177	175		177	162																													890	261
												178	176		178	162																													894	261
												179	177		179	162																													896	263
												180	177		180	163																													897	263
												181	178		181	164																													899	265
												182	179		182	165																													901	265
												183	180		183	166																													902	266
												184	180		184	167																													905	266
												185	181		185	168																													943	304
												186	182		186	169																													944	304
												187	183		187	169																													946	306
												188	184		188	169																													947	306
												189	185		189	170																													948	307
												190	185		190	170																													949	307
												191	186		191	171																													957	315
												192	187		192	172																													958	315
												193	188		193	173																													959	316
												194	189		194	173																													960	316
												195	189		195	174																													961	317
												196	189		196	175																													962	317
												197	189		197	176																													964	319
												198	190		198	177																													966	319
												199	190		199	178																													968	321
												200	191		200	178																													969	321
												201	191		201	179																													973	325
												202	191		202	179																													974	325
												203	191		203	180																													976	327
												204	192		204	180																													977	327
												205	192		205	180																													993	343
												206	192		206	181																													994	343
												207	192		207	181																													995	344
												208	192		208	181																													997	344
												209	192		209	182																													998	345
												210	192		210	183																													999	345
												211	193		211	184																													1002	348
												212	193		212	185																													1003	348
												213	193		213	185																													1005	350
												214	194		214	186																													1006	350
												215	194		215	186																													1008	352
												216	194		216	186																													1009	352
												217	194		217	187																													1012	355
												218	194		218	187																													1013	355
												219	195		219	187																													1017	359
												220	195		220	187																													1042	359
												221	196		221	187																													1043	360
												222	196		222	188																													1048	360
												223	197		223	189																													1053	365
												224	198		224	190																													1117	365
												225	199		225	191																													1119	367
												226	199		226	192																													1160	367
												227	199		227	193																													1161	368
												228	199		228	193																													1162	368
												229	200		229	194																													1163	369
												230	200		230	195																													1592	369
												231	200		231	195																													1593	370
												232	201		232	196																													1597	370
												233	201		233	196																													1598	371
												234	201		234	197																													1600	371
												235	201		235	197																													1601	372
												236	201		236	197																													1627	372
												237	201		237	198																													1628	373
												238	202		238	199																													1680	373
												239	202		239	200																													1681	374
												240	202		240	201																													1696	374
												241	202		241	202																													1698	376
												242	203		242	203																													1700	376
												243	204		243	203																													1701	377
												244	204		244	203																													1703	377
												245	204		245	203																													1706	380
												246	205		246	204																													1707	380
												247	206		247	205																													1711	384
												248	206		248	205																													1715	384
												249	206		249	206																													1716	385
												250	207		250	207																													1718	385
												251	207		251	208																													1719	386
												252	208		252	209																													1721	386
												253	208		253	210																													1722	387
												254	208		254	211																													1723	387
												255	208		255	212																													1726	390
												256	209		256	213																													1727	390
												257	209		257	214																													1728	391
												258	209		258	215																													1729	391
												259	209		259	216																													1733	395
												260	209		260	217																													1735	395
												261	209		261	218																													1736	396
												262	209		262	218																													1737	396
												263	210		263	219																													1739	398
												264	210		264	219																													1914	398
												265	210		265	220																													1916	400
												266	210		266	220																													2078	400
												267	210		267	221																													2079	401
												268	210		268	222																													2080	401
												269	210		269	223																													2082	403
												270	210		270	224																													2086	403
												271	210		271	225																													2087	404
												272	210		272	225																													4891	404
												273	210		273	225																													4892	405
												274	210		274	226																													4895	405
												275	211		275	227																													4898	408
												276	211		276	228																													4899	408
												277	211		277	229																													4903	412
												278	211		278	230																													6296	412
												279	211		279	231																													6297	413
												280	211		280	232																													7330	413
												281	211		281	233																													7331	414
												282	211		282	234																													7332	414
												283	211		283	234																													7334	416
												284	211		284	235																													8368	416
												285	211		285	235																													8369	417
												286	211		286	235																													8375	417
												287	211		287	236																													8376	418
												288	212		288	237																													8382	418
												289	212		289	238																													8383	419
												290	212		290	238																													8505	419
												291	212		291	239																													8506	420
												292	212		292	239																													10028	420
												293	212		293	239																													10033	425
												294	212		294	240																													10037	425
												295	212		295	241																													10038	426
												296	213		296	242																													10042	426
												297	213		297	242																													10043	427
												298	213		298	243																													10044	427
												299	214		299	244																													10045	428
												300	215		300	245																													10049	428
												301	215		301	246																													10050	429
												302	215		302	247																													10052	429
												303	215		303	248																													10053	430
												304	215		304	248																													10058	430
												305	215		305	249																													10062	434
												306	215		306	249																													10073	434
												307	216		307	249																													10074	435
												308	217		308	250																													10075	435
												309	217		309	250																													10076	436
												310	218		310	251																													10385	436
												311	219		311	251																													10386	437
												312	219		312	251																													12046	437
												313	220		313	251																													12047	438
												314	221		314	251																													12860	438
												315	222		315	251																													12861	439
												316	222		316	251																													12863	439
												317	222		317	252																													12864	440
												318	223		318	253																													13536	440
												319	224		319	253																													13537	441
												320	224		320	253																													23537	441
												321	225		321	253
												322	226		322	253
												323	226		323	253
												324	227		324	253
												325	228		325	253
												326	228		326	254
												327	229		327	254
												328	230		328	254
												329	231		329	254
												330	231		330	254
												331	231		331	254
												332	231		332	255
												333	232		333	255
												334	232		334	255
												335	232		335	255
												336	233		336	255
												337	233		337	255
												338	234		338	256
												339	235		339	256
												340	235		340	256
												341	236		341	256
												342	236		342	256
												343	236		343	256
												344	237		344	256
												345	237		345	256
												346	237		346	256
												347	237		347	256
												348	237		348	256
												349	237		349	256
												350	237		350	256
												351	237		351	256
												352	237		352	256
												353	237		353	256
												354	238		354	256
												355	239		355	257
												356	239		356	257
												357	239		357	257
												358	240		358	257
												359	241		359	257
												360	241		360	257
												361	241		361	257
												362	241		362	257
												363	242		363	257
												364	242		364	257
												365	242		365	257
												366	242		366	257
												367	242		367	257
												368	243		368	257
												369	244		369	257
												370	244		370	257
												371	245		371	257
												372	246		372	257
												373	247		373	257
												374	248		374	257
												375	248		375	257
												376	249		376	257
												377	249		377	257
												378	250		378	257
												379	250		379	257
												380	250		380	258
												381	251		381	258
												382	252		382	258
												383	252		383	258
												384	252		384	259
												385	253		385	259
												386	254		386	259
												387	255		387	259
												388	255		388	259
												389	255		389	259
												390	256		390	259
												391	256		391	259
												392	257		392	259
												393	258		393	259
												394	258		394	259
												395	259		395	259
												396	260		396	259
												397	260		397	259
												398	261		398	259
												399	262		399	259
												400	263		400	259
												401	264		401	259
												402	264		402	259
												403	265		403	259
												404	266		404	259
												405	266		405	259
												406	267		406	259
												407	268		407	259
												408	268		408	259
												409	268		409	259
												410	268		410	260
												411	269		411	260
												412	270		412	260
												413	270		413	260
												414	271		414	260
												415	271		415	260
												416	272		416	260
												417	272		417	260
												418	272		418	260
												419	273		419	260
												420	274		420	260
												421	275		421	260
												422	275		422	260
												423	276		423	260
												424	277		424	260
												425	277		425	260
												426	277		426	260
												427	278		427	260
												428	278		428	260
												429	278		429	260
												430	279		430	260
												431	279		431	260
												432	279		432	260
												433	279		433	260
												434	279		434	261
												435	279		435	261
												436	279		436	261
												437	279		437	261
												438	279		438	262
												439	279		439	262
												440	279		440	262
												441	279		441	262
												442	279		442	262
												443	279		443	262
												444	279		444	262
												445	279		445	262
												446	279		446	262
												447	279		447	263
												448	279		448	263
												449	279		449	263
												450	280		450	263
												451	280		451	263
												452	280		452	264
												453	281		453	264
												454	281		454	264
												455	281		455	264
												456	281		456	264
												457	281		457	265
												458	281		458	265
												459	281		459	265
												460	281		460	265
												461	281		461	265
												462	281		462	265
												463	281		463	265
												464	281		464	265
												465	281		465	265
												466	281		466	265
												467	281		467	265
												468	281		468	265
												469	281		469	265
												470	281		470	265
												471	282		471	265
												472	282		472	265
												473	282		473	265
												474	282		474	265
												475	282		475	265
												476	282		476	265
												477	282		477	265
												478	282		478	265
												479	282		479	265
												480	282		480	265
												481	282		481	265
												482	282		482	265
												483	282		483	265
												484	282		484	265
												485	282		485	265
												486	282		486	266
												487	282		487	266
												488	282		488	266
												489	282		489	266
												490	282		490	266
												491	282		491	266
												492	282		492	266
												493	282		493	266
												494	282		494	266
												495	283		495	266
												496	283		496	267
												497	283		497	268
												498	283		498	268
												499	283		499	268
												500	283		500	269
												501	283		501	269
												502	283		502	269
												503	283		503	269
												504	284		504	269
												505	284		505	270
												506	284		506	270
												507	284		507	270
												508	285		508	270
												509	285		509	270
												510	285		510	270
												511	285		511	270
												512	285		512	271
												513	285		513	271
												514	285		514	271
												515	285		515	271
												516	285		516	271
												517	285		517	271
												518	285		518	271
												519	285		519	271
												520	285		520	271
												521	285		521	272
												522	285		522	273
												523	286		523	273
												524	287		524	274
												525	287		525	274
												526	287		526	275
												527	287		527	275
												528	287		528	275
												529	287		529	275
												530	287		530	275
												531	287		531	275
												532	287		532	275
												533	287		533	275
												534	287		534	275
												535	287		535	275
												536	287		536	275
												537	287		537	275
												538	287		538	275
												539	287		539	275
												540	287		540	275
												541	288		541	275
												542	288		542	275
												543	289		543	275
												544	289		544	275
												545	289		545	276
												546	290		546	276
												547	290		547	276
												548	291		548	276
												549	292		549	276
												550	293		550	277
												551	293		551	277
												552	294		552	277
												553	295		553	277
												554	296		554	278
												555	296		555	278
												556	296		556	278
												557	297		557	278
												558	298		558	278
												559	298		559	278
												560	299		560	278
												561	299		561	278
												562	299		562	278
												563	299		563	278
												564	299		564	278
												565	299		565	278
												566	299		566	278
												567	299		567	278
												568	299		568	278
												569	299		569	278
												570	300		570	278
												571	300		571	278
												572	300		572	278
												573	300		573	278
												574	300		574	278
												575	300		575	278
												576	300		576	278
												577	300		577	278
												578	300		578	278
												579	300		579	278
												580	301		580	278
												581	301		581	278
												582	301		582	278
												583	301		583	279
												584	301		584	280
												585	301		585	280
												586	301		586	280
												587	301		587	281
												588	301		588	281
												589	301		589	281
												590	301		590	281
												591	301		591	281
												592	301		592	281
												593	301		593	282
												594	301		594	282
												595	301		595	282
												596	301		596	282
												597	302		597	282
												598	302		598	282
												599	302		599	283
												600	302		600	283
												601	302		601	283
												602	302		602	283
												603	302		603	283
												604	302		604	283
												605	302		605	283
												606	302		606	283
												607	302		607	283
												608	302		608	283
												609	302		609	283
												610	302		610	283
												611	302		611	283
												612	302		612	283
												613	302		613	283
												614	302		614	283
												615	302		615	283
												616	302		616	283
												617	303		617	283
												618	303		618	283
												619	303		619	283
												620	303		620	284
												621	303		621	284
												622	303		622	284
												623	303		623	284
												624	303		624	284
												625	303		625	284
												626	303		626	284
												627	303		627	284
												628	303		628	284
												629	303		629	284
												630	303		630	285
												631	303		631	286
												632	304		632	286
												633	304		633	286
												634	304		634	286
												635	304		635	286
												636	305		636	286
												637	305		637	286
												638	305		638	286
												639	305		639	286
												640	305		640	286
												641	306		641	287
												642	306		642	287
												643	306		643	287
												644	306		644	287
												645	306		645	287
												646	306		646	288
												647	306		647	288
												648	306		648	288
												649	307		649	288
												650	307		650	288
												651	307		651	288
												652	307		652	288
												653	308		653	288
												654	308		654	288
												655	308		655	288
												656	308		656	288
												657	308		657	288
												658	308		658	288
												659	308		659	288
												660	308		660	288
												661	308		661	288
												662	308		662	288
												663	308		663	288
												664	309		664	288
												665	309		665	288
												666	309		666	288
												667	309		667	288
												668	309		668	289
												669	309		669	290
												670	309		670	291
												671	309		671	292
												672	309		672	292
												673	309		673	292
												674	309		674	292
												675	309		675	292
												676	309		676	292
												677	309		677	292
												678	309		678	292
												679	309		679	292
												680	310		680	292
												681	310		681	292
												682	310		682	292
												683	310		683	292
												684	310		684	292
												685	310		685	292
												686	310		686	292
												687	310		687	292
												688	310		688	292
												689	310		689	292
												690	310		690	292
												691	310		691	292
												692	310		692	292
												693	310		693	292
												694	310		694	292
												695	310		695	292
												696	310		696	292
												697	310		697	292
												698	310		698	292
												699	310		699	292
												700	310		700	292
												701	310		701	292
												702	310		702	292
												703	310		703	292
												704	310		704	292
												705	310		705	292
												706	310		706	292
												707	310		707	292
												708	310		708	292
												709	310		709	292
												710	310		710	292
												711	310		711	292
												712	310		712	292
												713	310		713	292
												714	310		714	292
												715	311		715	292
												716	311		716	292
												717	311		717	292
												718	311		718	292
												719	311		719	292
												720	311		720	292
												721	311		721	293
												722	312		722	294
												723	313		723	294
												724	313		724	294
												725	313		725	294
												726	313		726	294
												727	313		727	294
												728	313		728	294
												729	313		729	294
												730	313		730	295
												731	313		731	295
												732	313		732	295
												733	313		733	296
												734	313		734	297
												735	313		735	297
												736	313		736	297
												737	313		737	297
												738	313		738	298
												739	313		739	298
												740	313		740	299
												741	313		741	299
												742	313		742	299
												743	313		743	299
												744	313		744	299
												745	313		745	299
												746	314		746	299
												747	314		747	299
												748	315		748	299
												749	315		749	299
												750	315		750	300
												751	315		751	300
												752	315		752	300
												753	315		753	300
												754	315		754	300
												755	315		755	301
												756	315		756	301
												757	315		757	301
												758	315		758	301
												759	315		759	301
												760	315		760	301
												761	316		761	301
												762	316		762	302
												763	316		763	302
												764	316		764	302
												765	316		765	302
												766	316		766	302
												767	316		767	302
												768	316		768	303
												769	316		769	303
												770	316		770	303
												771	316		771	303
												772	316		772	303
												773	316		773	303
												774	316		774	303
												775	316		775	303
												776	316		776	303
												777	316		777	303
												778	316		778	303
												779	316		779	303
												780	316		780	303
												781	316		781	303
												782	316		782	303
												783	316		783	303
												784	316		784	303
												785	317		785	303
												786	317		786	303
												787	317		787	303
												788	317		788	303
												789	317		789	303
												790	317		790	303
												791	317		791	303
												792	317		792	303
												793	317		793	303
												794	317		794	303
												795	317		795	303
												796	317		796	303
												797	317		797	303
												798	317		798	303
												799	317		799	303
												800	317		800	303
												801	317		801	303
												802	317		802	303
												803	317		803	303
												804	317		804	303
												805	317		805	303
												806	317		806	303
												807	317		807	303
												808	317		808	303
												809	317		809	303
												810	317		810	303
												811	317		811	303
												812	317		812	303
												813	317		813	304
												814	317		814	304
												815	317		815	304
												816	317		816	304
												817	317		817	304
												818	317		818	304
												819	317		819	304
												820	317		820	304
												821	317		821	304
												822	317		822	304
												823	318		823	304
												824	318		824	304
												825	318		825	304
												826	318		826	304
												827	318		827	304
												828	318		828	304
												829	318		829	304
												830	318		830	304
												831	318		831	304
												832	318		832	304
												833	318		833	304
												834	318		834	304
												835	318		835	304
												836	318		836	304
												837	318		837	304
												838	318		838	305
												839	318		839	305
												840	318		840	305
												841	318		841	305
												842	318		842	305
												843	318		843	305
												844	318		844	305
												845	318		845	305
												846	318		846	305
												847	318		847	305
												848	318		848	305
												849	318		849	305
												850	318		850	305
												851	318		851	305
												852	318		852	306
												853	318		853	306
												854	318		854	306
												855	318		855	306
												856	318		856	306
												857	318		857	306
												858	318		858	306
												859	318		859	306
												860	318		860	306
												861	318		861	306
												862	318		862	306
												863	318		863	306
												864	318		864	306
												865	318		865	306
												866	318		866	306
												867	318		867	306
												868	318		868	306
												869	318		869	306
												870	318		870	306
												871	318		871	306
												872	318		872	306
												873	318		873	306
												874	318		874	306
												875	318		875	306
												876	318		876	306
												877	318		877	306
												878	318		878	306
												879	318		879	306
												880	318		880	306
												881	318		881	306
												882	318		882	306
												883	318		883	306
												884	318		884	306
												885	318		885	306
												886	318		886	306
												887	318		887	306
												888	318		888	306
												889	318		889	306
												890	318		890	306
												891	318		891	306
												892	318		892	306
												893	318		893	306
												894	318		894	306
												895	318		895	306
												896	318		896	306
												897	318		897	306
												898	318		898	306
												899	318		899	306
												900	318		900	306
												901	318		901	306
												902	318		902	306
												903	318		903	306
												904	318		904	306
												905	318		905	306
												906	318		906	306
												907	318		907	306
												908	318		908	306
												909	318		909	306
												910	318		910	306
												911	318		911	306
												912	318		912	306
												913	318		913	306
												914	318		914	306
												915	318		915	306
												916	318		916	306
												917	318		917	306
												918	318		918	306
												919	318		919	306
												920	318		920	306
												921	318		921	306
												922	318		922	306
												923	318		923	306
												924	318		924	306
												925	318		925	306
												926	318		926	306
												927	318		927	306
												928	318		928	306
												929	319		929	306
												930	319		930	306
												931	319		931	306
												932	319		932	306
												933	319		933	306
												934	319		934	306
												935	319		935	306
												936	319		936	306
												937	319		937	306
												938	319		938	306
												939	319		939	306
												940	319		940	306
												941	319		941	306
												942	319		942	306
												943	319		943	306
												944	319		944	306
												945	319		945	306
												946	319		946	306
												947	319		947	306
												948	319		948	306
												949	319		949	306
												950	319		950	306
												951	319		951	306
												952	319		952	306
												953	319		953	306
												954	319		954	306
												955	319		955	306
												956	319		956	306
												957	319		957	306
												958	319		958	306
												959	319		959	306
												960	319		960	306
												961	319		961	306
												962	319		962	306
												963	319		963	306
												964	319		964	306
												965	319		965	306
												966	319		966	306
												967	319		967	306
												968	319		968	306
												969	319		969	306
												970	319		970	306
												971	319		971	306
												972	319		972	306
												973	319		973	306
												974	319		974	306
												975	319		975	306
												976	319		976	306
												977	319		977	306
												978	319		978	306
												979	319		979	306
												980	320		980	306
												981	320		981	306
												982	320		982	306
												983	320		983	306
												984	320		984	306
												985	320		985	306
												986	320		986	306
												987	320		987	306
												988	320		988	306
												989	320		989	306
												990	320		990	306
												991	320		991	306
												992	320		992	306
												993	320		993	306
												994	320		994	306
												995	320		995	306
												996	320		996	306
												997	320		997	306
												998	320		998	306
												999	320		999	306
												1000	320		1000	306
												1001	320		1001	306
												1002	320		1002	306
												1003	320		1003	306
												1004	320		1004	306
												1005	320		1005	306
												1006	320		1006	306
												1007	320		1007	306
												1008	320		1008	306
												1009	320		1009	306
												1010	320		1010	306
												1011	320		1011	306
												1012	320		1012	306
												1013	320		1013	306
												1014	320		1014	306
												1015	320		1015	306
												1016	320		1016	306
												1017	320		1017	306
												1018	320		1018	306
												1019	320		1019	306
												1020	320		1020	306
												1021	320		1021	306
												1022	320		1022	306
												1023	321		1023	306
												1024	321		1024	306
												1025	321		1025	306
												1026	321		1026	306
												1027	321		1027	306
												1028	321		1028	306
												1029	321		1029	306
												1030	321		1030	306
												1031	321		1031	306
												1032	321		1032	306
												1033	321		1033	306
												1034	321		1034	306
												1035	321		1035	306
												1036	321		1036	306
												1037	321		1037	306
												1038	321		1038	306
												1039	321		1039	306
												1040	321		1040	306
												1041	321		1041	306
												1042	321		1042	306
												1043	321		1043	306
												1044	321		1044	306
												1045	321		1045	306
												1046	321		1046	306
												1047	321		1047	306
												1048	321		1048	306
												1049	321		1049	306
												1050	321		1050	306
												1051	321		1051	306
												1052	321		1052	306
												1053	321		1053	306
												1054	321		1054	306
												1055	321		1055	306
												1056	321		1056	306
												1057	321		1057	306
												1058	321		1058	306
												1059	321		1059	306
												1060	321		1060	306
												1061	321		1061	306
												1062	321		1062	306
												1063	321		1063	306
												1064	322		1064	306
												1065	322		1065	306
												1066	322		1066	306
												1067	322		1067	306
												1068	322		1068	306
												1069	322		1069	306
												1070	322		1070	306
												1071	322		1071	306
												1072	322		1072	306
												1073	322		1073	306
												1074	322		1074	306
												1075	322		1075	306
												1076	322		1076	306
												1077	322		1077	306
												1078	322		1078	306
												1079	323		1079	306
												1080	323		1080	306
												1081	323		1081	306
												1082	324		1082	306
												1083	324		1083	306
												1084	324		1084	306
												1085	324		1085	306
												1086	324		1086	306
												1087	324		1087	306
												1088	324		1088	306
												1089	324		1089	306
												1090	324		1090	306
												1091	324		1091	306
												1092	324		1092	306
												1093	324		1093	306
												1094	324		1094	306
												1095	324		1095	306
												1096	324		1096	306
												1097	324		1097	306
												1098	324		1098	306
												1099	324		1099	306
												1100	324		1100	306
												1101	324		1101	306
												1102	324		1102	306
												1103	324		1103	306
												1104	324		1104	306
												1105	324		1105	306
												1106	324		1106	306
												1107	324		1107	306
												1108	324		1108	306
												1109	324		1109	306
												1110	324		1110	306
												1111	324		1111	306
												1112	324		1112	306
												1113	324		1113	306
												1114	324		1114	306
												1115	325		1115	306
												1116	325		1116	306
												1117	325		1117	306
												1118	325		1118	306
												1119	325		1119	306
												1120	325		1120	306
												1121	325		1121	306
												1122	325		1122	306
												1123	325		1123	306
												1124	325		1124	306
												1125	325		1125	306
												1126	325		1126	306
												1127	325		1127	306
												1128	325		1128	306
												1129	325		1129	306
												1130	325		1130	306
												1131	325		1131	306
												1132	325		1132	306
												1133	325		1133	306
												1134	325		1134	306
												1135	325		1135	306
												1136	325		1136	306
												1137	325		1137	306
												1138	325		1138	306
												1139	325		1139	306
												1140	325		1140	306
												1141	325		1141	306
												1142	325		1142	306
												1143	325		1143	306
												1144	325		1144	306
												1145	325		1145	306
												1146	325		1146	306
												1147	325		1147	306
												1148	325		1148	306
												1149	325		1149	306
												1150	325		1150	306
												1151	325		1151	306
												1152	325		1152	306
												1153	325		1153	306
												1154	325		1154	306
												1155	325		1155	306
												1156	325		1156	306
												1157	325		1157	306
												1158	325		1158	306
												1159	325		1159	306
												1160	325		1160	306
												1161	325		1161	306
												1162	325		1162	306
												1163	325		1163	306
												1164	325		1164	306
												1165	325		1165	306
												1166	325		1166	306
												1167	325		1167	306
												1168	325		1168	306
												1169	325		1169	306
												1170	325		1170	306
												1171	325		1171	306
												1172	325		1172	306
												1173	325		1173	306
												1174	325		1174	306
												1175	325		1175	306
												1176	325		1176	306
												1177	325		1177	306
												1178	325		1178	306
												1179	325		1179	306
												1180	325		1180	306
												1181	325		1181	306
												1182	325		1182	306
												1183	325		1183	306
												1184	325		1184	306
												1185	325		1185	306
												1186	325		1186	306
												1187	325		1187	306
												1188	325		1188	306
												1189	325		1189	306
												1190	325		1190	306
												1191	325		1191	306
												1192	325		1192	306
												1193	325		1193	306
												1194	325		1194	306
												1195	325		1195	306
												1196	325		1196	306
												1197	325		1197	306
												1198	325		1198	306
												1199	325		1199	306
												1200	325		1200	306
												1201	325		1201	306
												1202	325		1202	306
												1203	325		1203	306
												1204	325		1204	306
												1205	325		1205	306
												1206	325		1206	306
												1207	325		1207	306
												1208	325		1208	306
												1209	325		1209	306
												1210	325		1210	306
												1211	325		1211	306
												1212	325		1212	306
												1213	325		1213	306
												1214	325		1214	306
												1215	325		1215	306
												1216	325		1216	306
												1217	325		1217	306
												1218	325		1218	306
												1219	325		1219	306
												1220	325		1220	306
												1221	325		1221	306
												1222	325		1222	306
												1223	325		1223	306
												1224	325		1224	306
												1225	325		1225	306
												1226	325		1226	306
												1227	325		1227	306
												1228	325		1228	306
												1229	326		1229	306
												1230	326		1230	306
												1231	326		1231	306
												1232	326		1232	306
												1233	326		1233	306
												1234	326		1234	306
												1235	326		1235	306
												1236	326		1236	306
												1237	326		1237	306
												1238	326		1238	306
												1239	326		1239	306
												1240	326		1240	306
												1241	326		1241	306
												1242	326		1242	306
												1243	326		1243	306
												1244	326		1244	306
												1245	326		1245	306
												1246	326		1246	306
												1247	326		1247	306
												1248	326		1248	306
												1249	326		1249	306
												1250	326		1250	306
												1251	326		1251	306
												1252	326		1252	306
												1253	326		1253	306
												1254	326		1254	306
												1255	326		1255	306
												1256	326		1256	306
												1257	326		1257	306
												1258	326		1258	306
												1259	326		1259	306
												1260	326		1260	306
												1261	326		1261	306
												1262	327		1262	306
												1263	327		1263	306
												1264	327		1264	306
												1265	327		1265	306
												1266	327		1266	306
												1267	327		1267	306
												1268	327		1268	306
												1269	328		1269	306
												1270	328		1270	306
												1271	328		1271	306
												1272	329		1272	306
												1273	329		1273	306
												1274	329		1274	306
												1275	329		1275	306
												1276	329		1276	306
												1277	329		1277	306
												1278	329		1278	306
												1279	329		1279	306
												1280	329		1280	306
												1281	329		1281	306
												1282	329		1282	306
												1283	329		1283	306
												1284	329		1284	306
												1285	329		1285	306
												1286	329		1286	306
												1287	329		1287	306
												1288	329		1288	306
												1289	329		1289	306
												1290	329		1290	306
												1291	329		1291	306
												1292	329		1292	306
												1293	329		1293	306
												1294	329		1294	306
												1295	329		1295	306
												1296	329		1296	306
												1297	329		1297	306
												1298	329		1298	306
												1299	329		1299	306
												1300	329		1300	306
												1301	329		1301	306
												1302	329		1302	306
												1303	329		1303	306
												1304	329		1304	306
												1305	329		1305	306
												1306	329		1306	306
												1307	329		1307	306
												1308	329		1308	306
												1309	329		1309	306
												1310	329		1310	306
												1311	329		1311	306
												1312	329		1312	306
												1313	329		1313	306
												1314	329		1314	306
												1315	329		1315	306
												1316	329		1316	306
												1317	329		1317	306
												1318	329		1318	306
												1319	329		1319	306
												1320	329		1320	306
												1321	329		1321	306
												1322	329		1322	306
												1323	329		1323	306
												1324	329		1324	306
												1325	329		1325	306
												1326	329		1326	306
												1327	329		1327	306
												1328	329		1328	306
												1329	329		1329	306
												1330	329		1330	306
												1331	329		1331	306
												1332	329		1332	306
												1333	329		1333	306
												1334	329		1334	306
												1335	329		1335	306
												1336	329		1336	306
												1337	329		1337	306
												1338	329		1338	306
												1339	329		1339	306
												1340	329		1340	306
												1341	329		1341	306
												1342	329		1342	306
												1343	329		1343	306
												1344	329		1344	307
												1345	329		1345	307
												1346	329		1346	307
												1347	329		1347	307
												1348	329		1348	307
												1349	329		1349	307
												1350	329		1350	307
												1351	329		1351	307
												1352	329		1352	307
												1353	329		1353	307
												1354	329		1354	307
												1355	329		1355	308
												1356	329		1356	308
												1357	329		1357	308
												1358	329		1358	308
												1359	329		1359	308
												1360	329		1360	308
												1361	329		1361	308
												1362	329		1362	308
												1363	329		1363	308
												1364	329		1364	309
												1365	329		1365	309
												1366	329		1366	309
												1367	329		1367	309
												1368	329		1368	309
												1369	329		1369	309
												1370	329		1370	309
												1371	329		1371	309
												1372	329		1372	309
												1373	329		1373	309
												1374	330		1374	309
												1375	330		1375	309
												1376	330		1376	309
												1377	330		1377	309
												1378	330		1378	309
												1379	330		1379	309
												1380	330		1380	309
												1381	330		1381	309
												1382	330		1382	309
												1383	330		1383	309
												1384	330		1384	309
												1385	330		1385	309
												1386	330		1386	309
												1387	330		1387	310
												1388	330		1388	310
												1389	330		1389	310
												1390	330		1390	310
												1391	330		1391	310
												1392	330		1392	310
												1393	330		1393	311
												1394	330		1394	311
												1395	331		1395	312
												1396	331		1396	312
												1397	331		1397	312
												1398	331		1398	312
												1399	331		1399	312
												1400	331		1400	312
												1401	331		1401	312
												1402	331		1402	312
												1403	331		1403	313
												1404	331		1404	313
												1405	331		1405	313
												1406	331		1406	313
												1407	331		1407	313
												1408	331		1408	313
												1409	331		1409	313
												1410	331		1410	313
												1411	331		1411	313
												1412	331		1412	314
												1413	331		1413	314
												1414	331		1414	315
												1415	331		1415	315
												1416	331		1416	315
												1417	331		1417	315
												1418	331		1418	316
												1419	331		1419	316
												1420	331		1420	316
												1421	331		1421	316
												1422	331		1422	316
												1423	331		1423	317
												1424	331		1424	317
												1425	331		1425	317
												1426	331		1426	317
												1427	331		1427	318
												1428	331		1428	319
												1429	331		1429	319
												1430	331		1430	319
												1431	331		1431	319
												1432	331		1432	319
												1433	331		1433	320
												1434	332		1434	320
												1435	332		1435	321
												1436	332		1436	322
												1437	332		1437	322
												1438	333		1438	322
												1439	333		1439	322
												1440	334		1440	322
												1441	334		1441	322
												1442	334		1442	322
												1443	334		1443	322
												1444	334		1444	322
												1445	335		1445	322
												1446	335		1446	322
												1447	335		1447	322
												1448	335		1448	322
												1449	335		1449	322
												1450	335		1450	322
												1451	335		1451	322
												1452	335		1452	322
												1453	335		1453	322
												1454	335		1454	322
												1455	335		1455	322
												1456	335		1456	322
												1457	335		1457	322
												1458	335		1458	322
												1459	335		1459	322
												1460	335		1460	322
												1461	335		1461	322
												1462	335		1462	322
												1463	335		1463	322
												1464	335		1464	322
												1465	335		1465	322
												1466	335		1466	322
												1467	335		1467	322
												1468	335		1468	322
												1469	335		1469	322
												1470	335		1470	322
												1471	335		1471	322
												1472	335		1472	322
												1473	335		1473	322
												1474	335		1474	322
												1475	335		1475	322
												1476	335		1476	322
												1477	335		1477	322
												1478	335		1478	322
												1479	335		1479	322
												1480	335		1480	322
												1481	335		1481	322
												1482	335		1482	322
												1483	335		1483	322
												1484	335		1484	322
												1485	335		1485	322
												1486	335		1486	322
												1487	335		1487	322
												1488	335		1488	322
												1489	335		1489	322
												1490	335		1490	322
												1491	335		1491	322
												1492	335		1492	322
												1493	335		1493	322
												1494	335		1494	322
												1495	335		1495	322
												1496	335		1496	322
												1497	335		1497	322
												1498	335		1498	322
												1499	335		1499	322
												1500	335		1500	322
												1501	335		1501	322
												1502	335		1502	322
												1503	335		1503	322
												1504	335		1504	322
												1505	335		1505	322
												1506	335		1506	322
												1507	335		1507	322
												1508	335		1508	322
												1509	335		1509	322
												1510	335		1510	322
												1511	335		1511	322
												1512	335		1512	322
												1513	335		1513	322
												1514	335		1514	322
												1515	335		1515	322
												1516	335		1516	322
												1517	335		1517	322
												1518	335		1518	322
												1519	335		1519	322
												1520	335		1520	322
												1521	335		1521	322
												1522	335		1522	322
												1523	335		1523	322
												1524	335		1524	322
												1525	335		1525	322
												1526	335		1526	322
												1527	335		1527	322
												1528	335		1528	322
												1529	335		1529	322
												1530	335		1530	322
												1531	335		1531	322
												1532	335		1532	322
												1533	335		1533	322
												1534	335		1534	322
												1535	335		1535	322
												1536	335		1536	322
												1537	335		1537	322
												1538	335		1538	322
												1539	335		1539	322
												1540	335		1540	322
												1541	335		1541	322
												1542	335		1542	322
												1543	335		1543	322
												1544	335		1544	322
												1545	335		1545	322
												1546	335		1546	322
												1547	335		1547	322
												1548	335		1548	322
												1549	335		1549	322
												1550	335		1550	322
												1551	335		1551	322
												1552	335		1552	322
												1553	335		1553	322
												1554	335		1554	322
												1555	335		1555	322
												1556	335		1556	322
												1557	335		1557	322
												1558	335		1558	322
												1559	335		1559	322
												1560	335		1560	322
												1561	335		1561	322
												1562	335		1562	322
												1563	335		1563	323
												1564	335		1564	323
												1565	335		1565	323
												1566	335		1566	323
												1567	335		1567	323
												1568	335		1568	323
												1569	335		1569	323
												1570	335		1570	323
												1571	335		1571	323
												1572	335		1572	323
												1573	335		1573	323
												1574	335		1574	323
												1575	335		1575	323
												1576	335		1576	323
												1577	335		1577	323
												1578	335		1578	323
												1579	335		1579	323
												1580	335		1580	323
												1581	335		1581	323
												1582	335		1582	323
												1583	335		1583	323
												1584	335		1584	324
												1585	335		1585	324
												1586	335		1586	324
												1587	335		1587	324
												1588	335		1588	324
												1589	335		1589	324
												1590	335		1590	324
												1591	335		1591	324
												1592	335		1592	325
												1593	335		1593	326
												1594	335		1594	326
												1595	335		1595	326
												1596	335		1596	326
												1597	335		1597	326
												1598	335		1598	326
												1599	335		1599	326
												1600	335		1600	326
												1601	336		1601	327
												1602	336		1602	327
												1603	336		1603	327
												1604	336		1604	327
												1605	336		1605	327
												1606	336		1606	327
												1607	336		1607	327
												1608	336		1608	327
												1609	336		1609	327
												1610	336		1610	327
												1611	337		1611	327
												1612	337		1612	327
												1613	337		1613	327
												1614	337		1614	327
												1615	337		1615	327
												1616	337		1616	327
												1617	337		1617	328
												1618	337		1618	328
												1619	337		1619	328
												1620	337		1620	328
												1621	337		1621	328
												1622	337		1622	328
												1623	337		1623	328
												1624	337		1624	328
												1625	337		1625	328
												1626	337		1626	328
												1627	337		1627	328
												1628	337		1628	328
												1629	337		1629	328
												1630	337		1630	328
												1631	337		1631	328
												1632	337		1632	328
												1633	337		1633	328
												1634	337		1634	329
												1635	337		1635	329
												1636	337		1636	329
												1637	337		1637	329
												1638	337		1638	329
												1639	337		1639	329
												1640	337		1640	329
												1641	337		1641	329
												1642	337		1642	329
												1643	337		1643	329
												1644	337		1644	329
												1645	337		1645	329
												1646	337		1646	329
												1647	337		1647	329
												1648	337		1648	329
												1649	337		1649	329
												1650	337		1650	329
												1651	337		1651	329
												1652	337		1652	329
												1653	337		1653	329
												1654	337		1654	329
												1655	337		1655	329
												1656	337		1656	329
												1657	337		1657	329
												1658	337		1658	329
												1659	337		1659	329
												1660	337		1660	329
												1661	337		1661	329
												1662	337		1662	329
												1663	337		1663	329
												1664	337		1664	329
												1665	337		1665	329
												1666	337		1666	329
												1667	337		1667	329
												1668	337		1668	329
												1669	337		1669	329
												1670	337		1670	329
												1671	337		1671	329
												1672	337		1672	329
												1673	337		1673	329
												1674	337		1674	329
												1675	337		1675	329
												1676	337		1676	329
												1677	337		1677	329
												1678	337		1678	329
												1679	337		1679	329
												1680	337		1680	329
												1681	337		1681	329
												1682	337		1682	329
												1683	337		1683	329
												1684	337		1684	329
												1685	337		1685	329
												1686	337		1686	329
												1687	337		1687	329
												1688	337		1688	329
												1689	337		1689	329
												1690	337		1690	329
												1691	337		1691	329
												1692	337		1692	329
												1693	337		1693	329
												1694	337		1694	329
												1695	337		1695	329
												1696	337		1696	329
												1697	337		1697	329
												1698	337		1698	329
												1699	337		1699	329
												1700	337		1700	329
												1701	337		1701	329
												1702	337		1702	329
												1703	337		1703	329
												1704	337		1704	329
												1705	337		1705	329
												1706	337		1706	329
												1707	337		1707	329
												1708	337		1708	329
												1709	337		1709	329
												1710	337		1710	329
												1711	337		1711	329
												1712	337		1712	329
												1713	337		1713	329
												1714	337		1714	329
												1715	337		1715	329
												1716	337		1716	329
												1717	337		1717	329
												1718	337		1718	329
												1719	337		1719	329
												1720	337		1720	329
												1721	337		1721	329
												1722	337		1722	329
												1723	337		1723	329
												1724	337		1724	329
												1725	337		1725	329
												1726	337		1726	329
												1727	337		1727	329
												1728	337		1728	329
												1729	337		1729	329
												1730	337		1730	329
												1731	337		1731	329
												1732	337		1732	329
												1733	337		1733	329
												1734	337		1734	329
												1735	337		1735	329
												1736	337		1736	329
												1737	337		1737	329
												1738	337		1738	329
												1739	337		1739	329
												1740	337		1740	329
												1741	337		1741	329
												1742	337		1742	329
												1743	337		1743	329
												1744	337		1744	329
												1745	337		1745	329
												1746	337		1746	329
												1747	337		1747	329
												1748	337		1748	329
												1749	337		1749	329
												1750	337		1750	329
												1751	337		1751	329
												1752	337		1752	329
												1753	337		1753	329
												1754	337		1754	329
												1755	337		1755	329
												1756	337		1756	329
												1757	337		1757	329
												1758	337		1758	329
												1759	337		1759	329
												1760	337		1760	329
												1761	337		1761	329
												1762	337		1762	329
												1763	337		1763	329
												1764	337		1764	329
												1765	337		1765	329
												1766	337		1766	329
												1767	337		1767	329
												1768	337		1768	329
												1769	337		1769	329
												1770	337		1770	329
												1771	337		1771	329
												1772	337		1772	329
												1773	337		1773	329
												1774	337		1774	329
												1775	337		1775	329
												1776	337		1776	329
												1777	337		1777	329
												1778	337		1778	329
												1779	337		1779	329
												1780	337		1780	329
												1781	337		1781	329
												1782	337		1782	329
												1783	337		1783	329
												1784	337		1784	329
												1785	337		1785	329
												1786	337		1786	329
												1787	337		1787	329
												1788	337		1788	329
												1789	337		1789	329
												1790	337		1790	329
												1791	337		1791	329
												1792	337		1792	329
												1793	337		1793	329
												1794	337		1794	329
												1795	337		1795	329
												1796	337		1796	329
												1797	337		1797	329
												1798	337		1798	329
												1799	337		1799	329
												1800	337		1800	329
												1801	337		1801	329
												1802	337		1802	329
												1803	337		1803	329
												1804	337		1804	329
												1805	337		1805	329
												1806	337		1806	329
												1807	337		1807	329
												1808	337		1808	329
												1809	337		1809	329
												1810	337		1810	329
												1811	337		1811	329
												1812	337		1812	329
												1813	337		1813	329
												1814	337		1814	329
												1815	337		1815	329
												1816	337		1816	329
												1817	337		1817	329
												1818	337		1818	329
												1819	337		1819	329
												1820	337		1820	329
												1821	337		1821	329
												1822	337		1822	329
												1823	337		1823	329
												1824	337		1824	329
												1825	337		1825	329
												1826	337		1826	329
												1827	337		1827	329
												1828	337		1828	329
												1829	337		1829	329
												1830	337		1830	329
												1831	337		1831	329
												1832	337		1832	329
												1833	337		1833	329
												1834	337		1834	329
												1835	337		1835	329
												1836	337		1836	329
												1837	337		1837	329
												1838	337		1838	329
												1839	337		1839	329
												1840	337		1840	329
												1841	337		1841	329
												1842	337		1842	329
												1843	337		1843	330
												1844	337		1844	330
												1845	337		1845	330
												1846	337		1846	330
												1847	337		1847	330
												1848	337		1848	330
												1849	337		1849	330
												1850	337		1850	330
												1851	337		1851	330
												1852	337		1852	330
												1853	337		1853	330
												1854	337		1854	330
												1855	337		1855	330
												1856	337		1856	330
												1857	337		1857	330
												1858	337		1858	330
												1859	337		1859	330
												1860	337		1860	330
												1861	337		1861	330
												1862	337		1862	330
												1863	337		1863	330
												1864	337		1864	330
												1865	337		1865	330
												1866	337		1866	330
												1867	337		1867	330
												1868	337		1868	330
												1869	337		1869	330
												1870	337		1870	330
												1871	337		1871	330
												1872	337		1872	330
												1873	337		1873	330
												1874	337		1874	330
												1875	337		1875	330
												1876	337		1876	330
												1877	337		1877	330
												1878	337		1878	330
												1879	337		1879	330
												1880	337		1880	330
												1881	337		1881	330
												1882	337		1882	330
												1883	337		1883	330
												1884	337		1884	330
												1885	337		1885	330
												1886	337		1886	330
												1887	337		1887	330
												1888	337		1888	330
												1889	337		1889	330
												1890	337		1890	330
												1891	337		1891	330
												1892	337		1892	330
												1893	337		1893	330
												1894	337		1894	330
												1895	337		1895	330
												1896	337		1896	330
												1897	337		1897	330
												1898	337		1898	330
												1899	337		1899	330
												1900	337		1900	330
												1901	337		1901	330
												1902	337		1902	330
												1903	337		1903	330
												1904	337		1904	330
												1905	337		1905	330
												1906	337		1906	330
												1907	337		1907	330
												1908	337		1908	330
												1909	337		1909	330
												1910	337		1910	330
												1911	337		1911	330
												1912	337		1912	330
												1913	337		1913	330
												1914	337		1914	330
												1915	337		1915	330
												1916	337		1916	330
												1917	337		1917	330
												1918	337		1918	330
												1919	337		1919	330
												1920	337		1920	330
												1921	337		1921	330
												1922	337		1922	330
												1923	337		1923	330
												1924	337		1924	330
												1925	337		1925	330
												1926	337		1926	330
												1927	337		1927	330
												1928	337		1928	330
												1929	337		1929	330
												1930	337		1930	330
												1931	337		1931	330
												1932	337		1932	330
												1933	337		1933	330
												1934	337		1934	330
												1935	337		1935	330
												1936	337		1936	330
												1937	337		1937	330
												1938	337		1938	330
												1939	337		1939	330
												1940	337		1940	330
												1941	337		1941	330
												1942	337		1942	330
												1943	337		1943	330
												1944	337		1944	330
												1945	337		1945	330
												1946	337		1946	330
												1947	337		1947	330
												1948	337		1948	330
												1949	337		1949	330
												1950	337		1950	330
												1951	337		1951	330
												1952	337		1952	330
												1953	337		1953	330
												1954	337		1954	330
												1955	337		1955	330
												1956	337		1956	330
												1957	337		1957	330
												1958	337		1958	330
												1959	337		1959	330
												1960	337		1960	330
												1961	337		1961	330
												1962	337		1962	330
												1963	337		1963	330
												1964	337		1964	330
												1965	337		1965	330
												1966	337		1966	330
												1967	338		1967	330
												1968	338		1968	330
												1969	338		1969	330
												1970	338		1970	330
												1971	338		1971	330
												1972	338		1972	330
												1973	338		1973	330
												1974	338		1974	330
												1975	338		1975	330
												1976	338		1976	330
												1977	338		1977	330
												1978	338		1978	330
												1979	338		1979	330
												1980	338		1980	330
												1981	338		1981	330
												1982	338		1982	330
												1983	338		1983	330
												1984	338		1984	330
												1985	338		1985	330
												1986	338		1986	330
												1987	338		1987	330
												1988	338		1988	330
												1989	338		1989	330
												1990	338		1990	330
												1991	338		1991	330
												1992	338		1992	330
												1993	338		1993	330
												1994	338		1994	330
												1995	338		1995	330
												1996	338		1996	330
												1997	338		1997	330
[truncated: 6,430 more rows]
