# Supplementary material for: RNA Polymerase II cluster dynamics predict mRNA output in living cells
Source: eLife. 2016 May 3;5:e13617. doi: 10.7554/eLife.13617 (PMC4929003; doi:10.7554/eLife.13617)
Supplement: Figure 5—source data 1. — Averaged Pol II cluster lifetimes (for Figure 5A) and estimated numbers of mRNA (for Figure 5B) of each time point after serum stimulation are provided along with statistics. Simulation result of our theoretical model (for Figure 5D) is provided. DOI: http://dx.doi.org/10.7554/eLife.13617.017 [file elife-13617-fig5-data1.xlsx]

## Sheet: Figure 5A
Colocalized PolII cluster lifetime (Figure 5A)
Time after serum (min)	N total	Mean	Standard Deviation	SE of mean	Variance
5	15	7.95333	5.13839	1.32673	26.403
7.5	12	7.31667	3.98031	1.14902	15.8429
10	26	21.0673	17.5885	3.44939	309.356
12.5	25	24.078	18.1838	3.63676	330.651
15	16	16.8375	11.9341	2.98353	142.423
17.5	19	11.0658	7.28316	1.67087	53.0445
20	31	8.21935	5.25269	0.94341	27.5908
22.5	28	8.15714	4.83609	0.91393	23.3877
25	8	6.3375	4.44183	1.57042	19.7298
27.5	12	8.87083	6.11732	1.76592	37.4216
30	11	7.8	3.79974	1.14566	14.438
32.5	9	6.50556	2.60414	0.86805	6.78153
35	10	5.29	2.26897	0.71751	5.14822
37.5	11	5.30909	2.29508	0.69199	5.26741
40	10	4.115	2.68567	0.84928	7.21281
42.5	8	3.775	2.7772	0.98189	7.71286
45	5	5.88	1.9412	0.86813	3.76825
47.5	4	6.2125	2.07058	1.03529	4.28729
50	4	8.4	5.89675	2.94838	34.7717
52.5	7	6.8	5.29953	2.00303	28.085
55	11	5.27273	2.71941	0.81993	7.39518
57.5	9	5.27778	2.11218	0.70406	4.46132
60	6	8.36667	4.84207	1.97677	23.4457

## Sheet: Figure 5B
Number of nascent mRNA at the colocalized foci (Figure 5B)
Time after serum (min)	N total	Mean	Standard Deviation	SE of mean	Variance
5	5	4.21746	1.99178	0.89075	3.96718
7.5	4	7.28458	1.68298	0.84149	2.83243
10	10	13.0802	10.5426	3.33386	111.146
12.5	4	15.0345	2.27816	1.13908	5.19
15	10	18.0504	7.61981	2.4096	58.0616
17.5	4	11.5757	1.53793	0.76897	2.36524
20	8	11.5524	5.69483	2.01343	32.4311
22.5	4	6.49269	2.09799	1.04899	4.40156
25	5	5.97548	1.39554	0.6241	1.94752
27.5	4	4.85583	1.02154	0.51077	1.04355
30	11	5.45105	3.90713	1.17804	15.2657
32.5	4	4.50046	2.00922	1.00461	4.03695
35	5	5.59165	2.34986	1.05089	5.52185
37.5	4	4.62707	4.35852	2.17926	18.9967
40	5	4.28737	1.2081	0.54028	1.45951
42.5	4	3.54316	1.43541	0.7177	2.0604
45	7	3.93714	1.09931	0.4155	1.20848
47.5	4	2.8591	0.93973	0.46987	0.88309
50	5	2.8376	0.79951	0.35755	0.63921
52.5	4	3.29443	0.67705	0.33853	0.4584
55	8	3.3331	1.88112	0.66508	3.5386
57.5	5	3.46354	0.22611	0.10112	0.05113
60	5	2.34695	0.77635	0.34719	0.60272

## Sheet: Figure 5D
Theoretical model in Figure 5D
Time after serum (min)	PolII lifetime (sec)	number of mRNA
0	6.70011	5.12824
0.1	6.70014	5.12827
0.2	6.70017	5.1283
0.3	6.7002	5.12834
0.4	6.70024	5.12838
0.5	6.7003	5.12843
0.6	6.70036	5.1285
0.7	6.70043	5.12857
0.8	6.70052	5.12866
0.9	6.70062	5.12876
1	6.70075	5.12889
1.1	6.7009	5.12903
1.2	6.70107	5.12921
1.3	6.70128	5.12941
1.4	6.70153	5.12965
1.5	6.70182	5.12993
1.6	6.70216	5.13026
1.7	6.70256	5.13065
1.8	6.70303	5.1311
1.9	6.70359	5.13163
2	6.70423	5.13224
2.1	6.70499	5.13296
2.2	6.70587	5.13379
2.3	6.7069	5.13475
2.4	6.70809	5.13586
2.5	6.70948	5.13715
2.6	6.71108	5.13863
2.7	6.71293	5.14033
2.8	6.71507	5.1423
2.9	6.71754	5.14454
3	6.72037	5.14712
3.1	6.72362	5.15006
3.2	6.72734	5.15342
3.3	6.7316	5.15725
3.4	6.73647	5.16161
3.5	6.74201	5.16655
3.6	6.74832	5.17215
3.7	6.75549	5.17849
3.8	6.76362	5.18565
3.9	6.77281	5.19373
4	6.7832	5.20281
4.1	6.79492	5.21302
4.2	6.80811	5.22447
4.3	6.82293	5.2373
4.4	6.83956	5.25163
4.5	6.85818	5.26762
4.6	6.87899	5.28542
4.7	6.9022	5.30522
4.8	6.92806	5.32719
4.9	6.9568	5.35154
5	6.98869	5.37845
5.1	7.02401	5.40817
5.2	7.06306	5.44091
5.3	7.10616	5.47692
5.4	7.15362	5.51646
5.5	7.20581	5.55979
5.6	7.26308	5.60719
5.7	7.32582	5.65895
5.8	7.39441	5.71536
5.9	7.46926	5.77673
6	7.55079	5.84338
6.1	7.63942	5.91561
6.2	7.7356	5.99376
6.3	7.83976	6.07814
6.4	7.95235	6.16909
6.5	8.07382	6.26693
6.6	8.20461	6.37198
6.7	8.34516	6.48456
6.8	8.49591	6.60496
6.9	8.65727	6.7335
7	8.82966	6.87043
7.1	9.01344	7.01604
7.2	9.20899	7.17056
7.3	9.41662	7.3342
7.4	9.63664	7.50715
7.5	9.8693	7.68958
7.6	10.1148	7.88161
7.7	10.3734	8.08332
7.8	10.645	8.29474
7.9	10.9298	8.5159
8	11.2279	8.74672
8.1	11.5389	8.98711
8.2	11.863	9.23692
8.3	12.1997	9.49594
8.4	12.5489	9.76388
8.5	12.91	10.0404
8.6	13.2827	10.3252
8.7	13.6664	10.6177
8.8	14.0605	10.9174
8.9	14.4641	11.2238
9	14.8765	11.5362
9.1	15.2968	11.8538
9.2	15.7239	12.176
9.3	16.1568	12.5018
9.4	16.5943	12.8304
9.5	17.0352	13.1609
9.6	17.478	13.4922
9.7	17.9216	13.8232
9.8	18.3643	14.1531
9.9	18.8047	14.4804
10	19.2412	14.8043
10.1	19.6723	15.1234
10.2	20.0963	15.4366
10.3	20.5116	15.7426
10.4	20.9166	16.0404
10.5	21.3096	16.3287
10.6	21.6889	16.6063
10.7	22.0529	16.872
10.8	22.4002	17.1247
10.9	22.7292	17.3634
11	23.0383	17.587
11.1	23.3262	17.7944
11.2	23.5916	17.9848
11.3	23.8333	18.1573
11.4	24.05	18.3111
11.5	24.2408	18.4455
11.6	24.4048	18.5598
11.7	24.5412	18.6535
11.8	24.6493	18.7262
11.9	24.7286	18.7775
12	24.7787	18.8072
12.1	24.7994	18.8151
12.2	24.7905	18.8013
12.3	24.7522	18.7657
12.4	24.6845	18.7085
12.5	24.5879	18.6301
12.6	24.4627	18.5307
12.7	24.3097	18.4109
12.8	24.1295	18.2711
12.9	23.923	18.1122
13	23.6912	17.9347
13.1	23.4352	17.7396
13.2	23.1561	17.5276
13.3	22.8553	17.2998
13.4	22.5341	17.0572
13.5	22.194	16.8008
13.6	21.8364	16.5317
13.7	21.463	16.251
13.8	21.0753	15.96
13.9	20.675	15.6598
14	20.2636	15.3516
14.1	19.8429	15.0366
14.2	19.4144	14.7161
14.3	18.9799	14.3911
14.4	18.5408	14.0629
14.5	18.0988	13.7325
14.6	17.6555	13.4012
14.7	17.2122	13.07
14.8	16.7703	12.7399
14.9	16.3313	12.4119
15	15.8964	12.0869
15.1	15.4669	11.7658
15.2	15.0437	11.4495
15.3	14.6281	11.1386
15.4	14.2208	10.8339
15.5	13.8229	10.5361
15.6	13.4349	10.2456
15.7	13.0578	9.96297
15.8	12.6919	9.68869
15.9	12.3379	9.42312
16	11.9962	9.16656
16.1	11.667	8.91927
16.2	11.3507	8.68145
16.3	11.0475	8.45324
16.4	10.7574	8.23473
16.5	10.4804	8.02595
16.6	10.2167	7.82689
16.7	9.96596	7.63749
16.8	9.72818	7.45767
16.9	9.50313	7.28728
17	9.29057	7.12617
17.1	9.09023	6.97413
17.2	8.90178	6.83093
17.3	8.72488	6.69634
17.4	8.55916	6.57009
17.5	8.40421	6.45188
17.6	8.25963	6.34142
17.7	8.12499	6.23841
17.8	7.99985	6.14252
17.9	7.88376	6.05343
18	7.77628	5.97083
18.1	7.67697	5.89437
18.2	7.58537	5.82373
18.3	7.50105	5.7586
18.4	7.42358	5.69866
18.5	7.35253	5.64359
18.6	7.2875	5.59309
18.7	7.22809	5.54687
18.8	7.17391	5.50464
18.9	7.1246	5.46613
19	7.0798	5.43108
19.1	7.03917	5.39922
19.2	7.00239	5.37033
19.3	6.96916	5.34417
19.4	6.93919	5.32053
19.5	6.91221	5.29921
19.6	6.88797	5.28
19.7	6.86623	5.26273
19.8	6.84676	5.24724
19.9	6.82936	5.23336
20	6.81383	5.22095
20.1	6.80001	5.20987
20.2	6.78772	5.2
20.3	6.77682	5.19122
20.4	6.76716	5.18343
20.5	6.75862	5.17652
20.6	6.75108	5.1704
20.7	6.74444	5.165
20.8	6.7386	5.16024
20.9	6.73347	5.15605
21	6.72898	5.15236
21.1	6.72505	5.14913
21.2	6.72161	5.1463
21.3	6.71862	5.14383
21.4	6.71602	5.14167
21.5	6.71375	5.13979
21.6	6.71179	5.13815
21.7	6.71009	5.13673
21.8	6.70862	5.1355
21.9	6.70736	5.13444
22	6.70627	5.13352
22.1	6.70533	5.13272
22.2	6.70452	5.13204
22.3	6.70383	5.13146
22.4	6.70324	5.13095
22.5	6.70274	5.13052
22.6	6.70231	5.13015
22.7	6.70195	5.12984
22.8	6.70164	5.12957
22.9	6.70137	5.12934
23	6.70115	5.12915
23.1	6.70096	5.12898
23.2	6.7008	5.12884
23.3	6.70067	5.12873
23.4	6.70056	5.12863
23.5	6.70046	5.12854
23.6	6.70038	5.12847
23.7	6.70032	5.12842
23.8	6.70026	5.12837
23.9	6.70022	5.12832
24	6.70018	5.12829
24.1	6.70015	5.12826
24.2	6.70012	5.12824
24.3	6.7001	5.12822
24.4	6.70008	5.1282
24.5	6.70007	5.12819
24.6	6.70005	5.12818
24.7	6.70004	5.12817
24.8	6.70004	5.12816
24.9	6.70003	5.12815
25	6.70002	5.12815
25.1	6.70002	5.12814
25.2	6.70002	5.12814
25.3	6.70001	5.12814
25.4	6.70001	5.12813
25.5	6.70001	5.12813
25.6	6.70001	5.12813
25.7	6.70001	5.12813
25.8	6.7	5.12813
25.9	6.7	5.12813
26	6.7	5.12813
26.1	6.7	5.12813
26.2	6.7	5.12813
26.3	6.7	5.12813
26.4	6.7	5.12813
26.5	6.7	5.12813
26.6	6.7	5.12813
26.7	6.7	5.12813
26.8	6.7	5.12813
26.9	6.7	5.12813
27	6.7	5.12813
27.1	6.7	5.12813
27.2	6.7	5.12813
27.3	6.7	5.12813
27.4	6.7	5.12813
27.5	6.7	5.12813
27.6	6.7	5.12813
27.7	6.7	5.12813
27.8	6.7	5.12813
27.9	6.7	5.12813
28	6.7	5.12813
28.1	6.7	5.12813
28.2	6.7	5.12813
28.3	6.7	5.12813
28.4	6.7	5.12813
28.5	6.7	5.12813
28.6	6.7	5.12813
28.7	6.7	5.12813
28.8	6.7	5.12813
28.9	6.7	5.12813
29	6.7	5.12813
29.1	6.7	5.12813
29.2	6.7	5.12813
29.3	6.7	5.12813
29.4	6.7	5.12813
29.5	6.7	5.12813
29.6	6.7	5.12813
29.7	6.7	5.12813
29.8	6.7	5.12813
29.9	6.7	5.12813
30	6.7	5.12813
30.1	6.7	5.12813
30.2	6.7	5.12813
30.3	6.7	5.12813
30.4	6.7	5.12813
30.5	6.7	5.12813
30.6	6.7	5.12813
30.7	6.7	5.12813
30.8	6.7	5.12813
30.9	6.7	5.12813
31	6.7	5.12813
31.1	6.7	5.12813
31.2	6.7	5.12813
31.3	6.7	5.12813
31.4	6.7	5.12813
31.5	6.7	5.12813
31.6	6.7	5.12813
31.7	6.7	5.12813
31.8	6.7	5.12813
31.9	6.7	5.12813
32	6.7	5.12813
32.1	6.7	5.12813
32.2	6.7	5.12813
32.3	6.7	5.12813
32.4	6.7	5.12813
32.5	6.7	5.12813
32.6	6.7	5.12813
32.7	6.7	5.12813
32.8	6.7	5.12813
32.9	6.7	5.12813
33	6.7	5.12813
33.1	6.7	5.12813
33.2	6.7	5.12813
33.3	6.7	5.12813
33.4	6.7	5.12813
33.5	6.7	5.12813
33.6	6.7	5.12813
33.7	6.7	5.12813
33.8	6.7	5.12813
33.9	6.7	5.12813
34	6.7	5.12813
34.1	6.7	5.12813
34.2	6.7	5.12813
34.3	6.7	5.12813
34.4	6.7	5.12813
34.5	6.7	5.12813
34.6	6.7	5.12813
34.7	6.7	5.12813
34.8	6.7	5.12813
34.9	6.7	5.12813
35	6.7	5.12813
35.1	6.7	5.12813
35.2	6.7	5.12813
35.3	6.7	5.12813
35.4	6.7	5.12813
35.5	6.7	5.12813
35.6	6.7	5.12813
35.7	6.7	5.12813
35.8	6.7	5.12813
35.9	6.7	5.12813
36	6.7	5.12813
36.1	6.7	5.12813
36.2	6.7	5.12813
36.3	6.7	5.12813
36.4	6.7	5.12813
36.5	6.7	5.12813
36.6	6.7	5.12813
36.7	6.7	5.12813
36.8	6.7	5.12813
36.9	6.7	5.12813
37	6.7	5.12813
37.1	6.7	5.12813
37.2	6.7	5.12813
37.3	6.7	5.12813
37.4	6.7	5.12813
37.5	6.7	5.12813
37.6	6.7	5.12813
37.7	6.7	5.12813
37.8	6.7	5.12813
37.9	6.7	5.12813
38	6.7	5.12813
38.1	6.7	5.12813
38.2	6.7	5.12813
38.3	6.7	5.12813
38.4	6.7	5.12813
38.5	6.7	5.12813
38.6	6.7	5.12813
38.7	6.7	5.12813
38.8	6.7	5.12813
38.9	6.7	5.12813
39	6.7	5.12813
39.1	6.7	5.12813
39.2	6.7	5.12813
39.3	6.7	5.12813
39.4	6.7	5.12813
39.5	6.7	5.12813
39.6	6.7	5.12813
39.7	6.7	5.12813
39.8	6.7	5.12813
39.9	6.7	5.12813
40	6.7	5.12813
40.1	6.7	5.12813
40.2	6.7	5.12813
40.3	6.7	5.12813
40.4	6.7	5.12813
40.5	6.7	5.12813
40.6	6.7	5.12813
40.7	6.7	5.12813
40.8	6.7	5.12813
40.9	6.7	5.12813
41	6.7	5.12813
41.1	6.7	5.12813
41.2	6.7	5.12813
41.3	6.7	5.12813
41.4	6.7	5.12813
41.5	6.7	5.12813
41.6	6.7	5.12813
41.7	6.7	5.12813
41.8	6.7	5.12813
41.9	6.7	5.12813
42	6.7	5.12813
42.1	6.7	5.12813
42.2	6.7	5.12813
42.3	6.7	5.12813
42.4	6.7	5.12813
42.5	6.7	5.12813
42.6	6.7	5.12813
42.7	6.7	5.12813
42.8	6.7	5.12813
42.9	6.7	5.12813
43	6.7	5.12813
43.1	6.7	5.12813
43.2	6.7	5.12813
43.3	6.7	5.12813
43.4	6.7	5.12813
43.5	6.7	5.12813
43.6	6.7	5.12813
43.7	6.7	5.12813
43.8	6.7	5.12813
43.9	6.7	5.12813
44	6.7	5.12813
44.1	6.7	5.12813
44.2	6.7	5.12813
44.3	6.7	5.12813
44.4	6.7	5.12813
44.5	6.7	5.12813
44.6	6.7	5.12813
44.7	6.7	5.12813
44.8	6.7	5.12813
44.9	6.7	5.12813
45	6.7	5.12813
45.1	6.7	5.12813
45.2	6.7	5.12813
45.3	6.7	5.12813
45.4	6.7	5.12813
45.5	6.7	5.12813
45.6	6.7	5.12813
45.7	6.7	5.12813
45.8	6.7	5.12813
45.9	6.7	5.12813
46	6.7	5.12813
46.1	6.7	5.12813
46.2	6.7	5.12813
46.3	6.7	5.12813
46.4	6.7	5.12813
46.5	6.7	5.12813
46.6	6.7	5.12813
46.7	6.7	5.12813
46.8	6.7	5.12813
46.9	6.7	5.12813
47	6.7	5.12813
47.1	6.7	5.12813
47.2	6.7	5.12813
47.3	6.7	5.12813
47.4	6.7	5.12813
47.5	6.7	5.12813
47.6	6.7	5.12813
47.7	6.7	5.12813
47.8	6.7	5.12813
47.9	6.7	5.12813
48	6.7	5.12813
48.1	6.7	5.12813
48.2	6.7	5.12813
48.3	6.7	5.12813
48.4	6.7	5.12813
48.5	6.7	5.12813
48.6	6.7	5.12813
48.7	6.7	5.12813
48.8	6.7	5.12813
48.9	6.7	5.12813
49	6.7	5.12813
49.1	6.7	5.12813
49.2	6.7	5.12813
49.3	6.7	5.12813
49.4	6.7	5.12813
49.5	6.7	5.12813
49.6	6.7	5.12813
49.7	6.7	5.12813
49.8	6.7	5.12813
49.9	6.7	5.12813
50	6.7	5.12813
50.1	6.7	5.12813
50.2	6.7	5.12813
50.3	6.7	5.12813
50.4	6.7	5.12813
50.5	6.7	5.12813
50.6	6.7	5.12813
50.7	6.7	5.12813
50.8	6.7	5.12813
50.9	6.7	5.12813
51	6.7	5.12813
51.1	6.7	5.12813
51.2	6.7	5.12813
51.3	6.7	5.12813
51.4	6.7	5.12813
51.5	6.7	5.12813
51.6	6.7	5.12813
51.7	6.7	5.12813
51.8	6.7	5.12813
51.9	6.7	5.12813
52	6.7	5.12813
52.1	6.7	5.12813
52.2	6.7	5.12813
52.3	6.7	5.12813
52.4	6.7	5.12813
52.5	6.7	5.12813
52.6	6.7	5.12813
52.7	6.7	5.12813
52.8	6.7	5.12813
52.9	6.7	5.12813
53	6.7	5.12813
53.1	6.7	5.12813
53.2	6.7	5.12813
53.3	6.7	5.12813
53.4	6.7	5.12813
53.5	6.7	5.12813
53.6	6.7	5.12813
53.7	6.7	5.12813
53.8	6.7	5.12813
53.9	6.7	5.12813
54	6.7	5.12813
54.1	6.7	5.12813
54.2	6.7	5.12813
54.3	6.7	5.12813
54.4	6.7	5.12813
54.5	6.7	5.12813
54.6	6.7	5.12813
54.7	6.7	5.12813
54.8	6.7	5.12813
54.9	6.7	5.12813
55	6.7	5.12813
55.1	6.7	5.12813
55.2	6.7	5.12813
55.3	6.7	5.12813
55.4	6.7	5.12813
55.5	6.7	5.12813
55.6	6.7	5.12813
55.7	6.7	5.12813
55.8	6.7	5.12813
55.9	6.7	5.12813
56	6.7	5.12813
56.1	6.7	5.12813
56.2	6.7	5.12813
56.3	6.7	5.12813
56.4	6.7	5.12813
56.5	6.7	5.12813
56.6	6.7	5.12813
56.7	6.7	5.12813
56.8	6.7	5.12813
56.9	6.7	5.12813
57	6.7	5.12813
57.1	6.7	5.12813
57.2	6.7	5.12813
57.3	6.7	5.12813
57.4	6.7	5.12813
57.5	6.7	5.12813
57.6	6.7	5.12813
57.7	6.7	5.12813
57.8	6.7	5.12813
57.9	6.7	5.12813
58	6.7	5.12813
