# Supplementary material for: RNA Polymerase II cluster dynamics predict mRNA output in living cells
Source: eLife. 2016 May 3;5:e13617. doi: 10.7554/eLife.13617 (PMC4929003; doi:10.7554/eLife.13617)
Supplement: Figure 6—source data 1. — Averaged numbers of nascent β-actin mRNA for each time point upon DRB addition/removal were provided. DOI: http://dx.doi.org/10.7554/eLife.13617.021 [file elife-13617-fig6-data1.xlsx]

## Sheet: Sheet1
DRB exchange experiments (Figure 6C and Figure 6-figure supplement 1)
						Figure 6C
10min(DRB addition)-15min(DRB removal)						10min(DRB addition)-20min(DRB removal)						10min(DRB addition)-25min(DRB removal)						10min(DRB addition)-30min(DRB removal)
Time (min)	N total	Mean	Standard Deviation	SE of mean		Time (min)	N total	Mean	Standard Deviation	SE of mean		Time (min)	N total	Mean	Standard Deviation	SE of mean		Time (min)	N total	Mean	Standard Deviation	SE of mean
4	5	3.5209	0.74318	0.52551		5	3	3.81913	0.4091	0.28928		5	3	3.12106	0.77726	0.54961		5	4	4.78333	0.30946	0.17866
6	5	3.85287	2.38307	1.37587		6	3	4.54458	0.63137	0.44644		6	3	4.45753	1.43356	1.01368		7	5	6.26183	2.48149	1.24075
7	5	7.10591	0.96056	0.55458		7	4	6.22625	0.16739	0.11836		9	3	6.93678	0.21724	0.15361		8	5	7.83924	0.94056	0.47028
8	1	7.71819	0.26997	0.15587		8	3	7.01439	0.13497	0.09544		11	4	7.69714	1.37978	0.79661		10	3	10.0656	1.47177	1.0407
9	4	11.667	5.10852	1.93084		9	4	11.3006	1.55335	0.89683		13	4	3.6056	2.03464	1.1747		11	4	6.59141	0.58382	0.33707
10	5	10.5967	1.96398	0.98199		10	4	13.1127	5.21762	3.0124		14	3	3.51694	2.42407	1.71407		12	5	5.27242	1.45194	0.72597
11	1	5.29174	0.51559	0.29767		11	3	14.6903	0.43999	0.31112		18	2	1.54191	1.33534	0.77096		13	4	3.67893	0.73321	0.42332
12	5	9.98164	4.30775	1.62818		13	5	8.60644	1.2879	0.74357		19	2	1.11499	1.57683	1.11499		14	4	2.63711	1.25542	0.72482
13	3	5.92717	3.29049	1.89977		14	3	3.75545	0.53104	0.3755		20	4	1.45361	1.37659	0.79478		15	3	2.73635	0.53253	0.37655
14	3	5.79536	2.61272	1.16844		15	4	6.93876	1.04653	0.74001		21	3	2.04896	2.89767	2.04896		16	3	3.44615	4.87359	3.44615
15	7	4.11799	2.85242	1.27564		16	3	1.97536	0.06562	0.0464		22	4	0.55264	0.78154	0.55264		25	3	1.05999	1.49905	1.05999
17	5	2.90661	1.05086	0.60671		18	6	1.63469	1.43821	0.83035		25	3	1.47878	2.09131	1.47878		26	3	1.3336	1.886	1.3336
18	4	3.21281	1.3323	0.66615		22	5	1.42817	1.23757	0.71451		27	3	0.73132	1.03425	0.73132		31	3	0.64923	0.91815	0.64923
19	5	3.92177	0.27464	0.15856		25	3	2.03809	0.07622	0.05389		32	3	2.26925	0.77163	0.4455		32	3	2.65999	0.59583	0.42132
20	6	2.70326	1.41763	1.00241		28	5	1.76572	0.06396	0.04523		34	3	5.37505	2.93182	1.19691		33	5	2.19707	1.21215	0.60608
21	6	5.53576	0.09953	0.07038		30	3	4.66932	0.74878	0.52947		35	2	3.64327	1.68547	0.97311		34	5	3.61609	1.17521	0.58761
22	5	4.59928	2.21568	1.27922		31	4	4.7228	2.24017	1.58404		36	2	4.10305	1.55433	0.89739		35	4	3.74501	1.80592	1.04265
23	4	5.54006	1.37739	0.6887		32	5	7.71847	2.14999	1.52027		37	4	5.39068	4.6071	2.65991		36	3	2.13061	0.07239	0.05119
24	3	3.51141	1.77106	0.79204		33	3	9.38383	5.91901	4.18537		38	2	7.2753	2.33914	1.3505		37	3	3.12049	1.46241	1.03408
25	3	6.64294	5.64942	1.99737		34	3	15.6598	2.02083	1.42894		39	7	9.66152	0.39806	0.22982		38	4	3.95804	0.45756	0.26417
26	4	4.41794	1.83406	0.82022		37	2	9.93637	1.78436	1.26173		41	4	13.2864	2.83381	2.00381		39	4	5.71888	0.48561	0.28037
27	4	5.15649	2.01504	1.00752		39	3	11.4311	6.86787	4.85632		42	4	11.7532	0.6327	0.44738		40	4	3.75116	1.28253	0.74047
28	1	5.6231	2.45446	1.22723		40	3	8.67308	8.24437	4.75989		43	4	7.60027	3.38314	1.95326		41	6	6.28885	4.99313	2.233
29	5	7.37063	4.74539	1.79359		41	4	4.60966	0.70684	0.49981		44	4	6.81524	4.21251	2.9787		42	4	3.73952	0.55417	0.31995
30	5	8.42098	8.78827	5.07391		43	3	2.98437	0.17622	0.12461		45	4	10.7519	4.98422	2.87764		43	5	5.43074	3.91844	1.95922
31	4	9.23675	1.6772	0.96833		44	4	3.65466	0.50414	0.35648		47	3	11.1163	4.45625	2.57282		44	3	4.19149	0.63574	0.44954
32	4	5.97411	1.72296	0.86148		49	3	4.12292	1.71412	1.21207		48	3	4.86277	1.56037	1.10335		45	4	6.98945	3.56371	2.05751
33	5	7.42074	1.98172	0.99086		50	3	1.68703	0.41617	0.29428		49	4	5.01143	3.09841	1.78887		46	3	3.84677	1.89535	1.34021
34	5	11.7221	5.29603	3.05766		53	3	3.39074	1.27723	0.90314		50	2	6.66871	1.53326	1.08418		47	5	8.04918	6.56075	3.28038
35	5	9.12986	0.12344	0.07127		56	3	2.64318	0.48709	0.34442		55	3	2.64806	0.71532	0.50581		48	4	9.07084	7.98993	4.61299
36	4	4.60034	1.48254	0.85595		58	4	3.48695	0.70753	0.5003		60	3	3.33771	0.52981	0.37463		49	3	5.38967	1.5444	1.09206
37	2	3.69449	1.97424	0.98712		59	3	3.15782	1.48359	1.04906								50	4	8.16219	3.9789	2.29722
38	4	4.44764	2.61954	1.06942		60	3	2.18382	0.02568	0.01816								51	3	7.54191	3.23551	2.28785
39	3	3.72968	1.75163	0.87582														52	4	11.6449	4.77578	2.7573
40	5	3.7949	0.51981	0.23247														53	4	9.47455	7.50286	4.33178
41	5	3.80205	0.67036	0.38704														58	3	3.55518	0.16469	0.11646
42	6	3.04595	0.76758	0.44316
43	5	5.72427	0.24651	0.17431
44	7	3.4821	0.79375	0.45827
